# Supplementary material for: Cardiovascular risk factors in gout, psoriatic arthritis, rheumatoid arthritis and ankylosing spondylitis: a cross-sectional survey of patients in Western Sweden
Source: HighWire-hosted journal article supplement (doi:10.1136/rmdopen-2021-001568), 2021-05-01
Supplement: rmdopen-2021-001568supp001_data_supplement.pdf [file rmdopen-2021-001568supp001_data_supplement.pdf]

Supplementary table 1, Responder- and non-responder data stratified by diagnosis, data compared across diagnoses by chi square tests or t-tests as appropriate

| Diagnosis | Responders age, mean (SD) | Non-responders age, mean (SD) | p-value | Male sex, responders (%) | Male sex, non-responders (%) | p-value |
|-----------|---------------------------|-------------------------------|---------|--------------------------|------------------------------|---------|
| PsA       | 56.6 (13.2)               | 52.0 (13.8)                   | <0.001  | 46.9                     | 51.5                         | 0.118   |
| AS        | 51.1 (14.8)               | 44.5 (13.5)                   | <0.001  | 56.4                     | 65.6                         | 0.002   |
| RA        | 66.8 (13.1)               | 62.7 (15.9)                   | <0.001  | 47.8                     | 46.4                         | 0.623   |
| Gout      | 71.3 (11.9)               | 69.1 (15.5)                   | 0.001   | 79.6                     | 67.7                         | <0.001  |

PsA=Psoriatic arthritis; AS=Ankylosing spondylitis; RA=Rheumatoid arthritis  
SD=Standard deviation
